# Supplementary material for: Replication Control of Human Telomere G-Quadruplex DNA by G-Quadruplex Ligands Dependent on Solution Environment
Source: Life (Basel). 2022 Apr 7;12(4):553. doi: 10.3390/life12040553 (PMC9024748; doi:10.3390/life12040553)
Supplement: Supplementary file 1 [file life-12-00553-s001.zip › life-1669289-supplementary.pdf]

**Table S1. DNA sequences used in this study**

|                                                            |                                                                                    |
|------------------------------------------------------------|------------------------------------------------------------------------------------|
| FAM-labeled<br>primer                                      | 5'-FAM-GGGATGATACTAGTGCTTCGGCTTAATACGACTCACTATAGGG-3'                              |
| (T <sub>2</sub> AG <sub>3</sub> ) <sub>4</sub><br>template | 5'-TTAGGGTTAGGGTTAGGGTTAGGGCGGCCCCCTATAGTGAGTCGTATTAAGCC<br>GAAGCACTAGTATCATCCC-3' |
| (T <sub>2</sub> AG <sub>3</sub> ) <sub>4</sub>             | 5'-TTAGGGTTAGGGTTAGGGTTAGGG-3'                                                     |

**Table S2.** Quantitative study of topology-dependent replication (QSTR) data calculated using the parameters listed in Table 2

| Ligand  | Condition <sup>a</sup>     | $-\Delta\Delta G^\circ_{37}$<br>(kcal mol <sup>-1</sup> ) | $\Delta\Delta G^\ddagger_{37}$<br>(kcal mol <sup>-1</sup> ) | $S_i$ <sup>b</sup> | $\alpha$ <sup>c</sup> |
|---------|----------------------------|-----------------------------------------------------------|-------------------------------------------------------------|--------------------|-----------------------|
| NDI-DM  | 1 mM KCl 0 wt%<br>PEG200   | 1.3                                                       | 1.2                                                         | 0.86               | 1                     |
| cNDI1   |                            | 1.9                                                       | 1.8                                                         | 0.94               | 1.1                   |
| cNDI2   |                            | 1.2                                                       | 2.1                                                         | 1.77               | 2.0                   |
| fisetin |                            | -0.2                                                      | 1.2                                                         | -6.1               | -6.9                  |
| NDI-DM  | 100 mM KCl 0<br>wt% PEG200 | 1                                                         | 1.3                                                         | 1.3                | 1                     |
| cNDI1   |                            | 1.4                                                       | 1.7                                                         | 1.2                | 0.9                   |
| cNDI2   |                            | 0.6                                                       | 1.3                                                         | 2.1                | 1.6                   |
| TMPyP4  |                            | 1.4                                                       | 1.1                                                         | 0.82               | 0.6                   |
| NMM     |                            | 0.1                                                       | 0.3                                                         | 2.8                | 2.1                   |
| fisetin |                            | -0.6                                                      | 1.6                                                         | -2.6               | -1.9                  |
| NDI-DM  | 1 mM KCl 20<br>wt% PEG200  | 1                                                         | 1.5                                                         | 1.5                | 1                     |
| cNDI1   |                            | 1.4                                                       | 1.6                                                         | 1.1                | 0.7                   |
| cNDI2   |                            | 0.9                                                       | 1.6                                                         | 1.7                | 1.1                   |
| TMPyP4  |                            | 0.1                                                       | 1.2                                                         | 12.1               | 8.0                   |
| NMM     |                            | -0.5                                                      | 1.2                                                         | -2.3               | -1.5                  |
| fisetin |                            | -0.6                                                      | -0.6                                                        | 1.1                | 0.7                   |

<sup>a</sup> All experiments were performed in 10 mM Tris-hydrochloric acid (HCl) (pH 7.5), 1 or 100 mM potassium chloride (KCl), and 8 mM magnesium chloride (MgCl<sub>2</sub>) at 37 °C with or without poly(ethylene glycol200) (PEG200).

<sup>b</sup>  $S_i$  was calculated using the following formula:  $(\Delta\Delta G^\ddagger_{37} \text{ for each ligand})/(-\Delta\Delta G^\circ_{37} \text{ for each ligand})$ .

<sup>c</sup>  $\alpha$  was calculated using the following formula:  $S_i/S$ , where  $S$  is the  $S_i$  of naphthalene diimides (NDI)-DM.

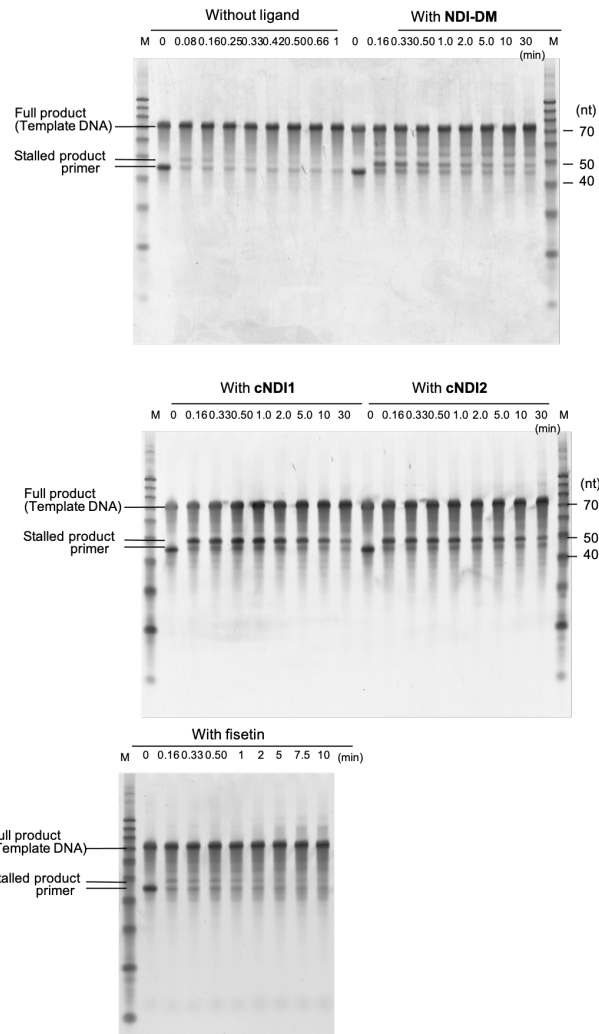

**Figure S1.** Images of the gels shown in Figure 2b were stained with the SYBR Gold reagent. Fluorescently labeled primers, full-length products, stalled products, and template strands were visible in these images. The molecular weight markers (lane M) show a 10-bp DNA ladder. In each lane, the uppermost band corresponds to the template DNA and the lowest band corresponds to the FAM-labeled primer. The reaction mixture was incubated for the indicated times in the absence or presence of ligand. In the samples incubated with the enzyme, the full-length product band overlapped with that of the template DNA, and the stalled product, which migrated just above the primer, was observed.

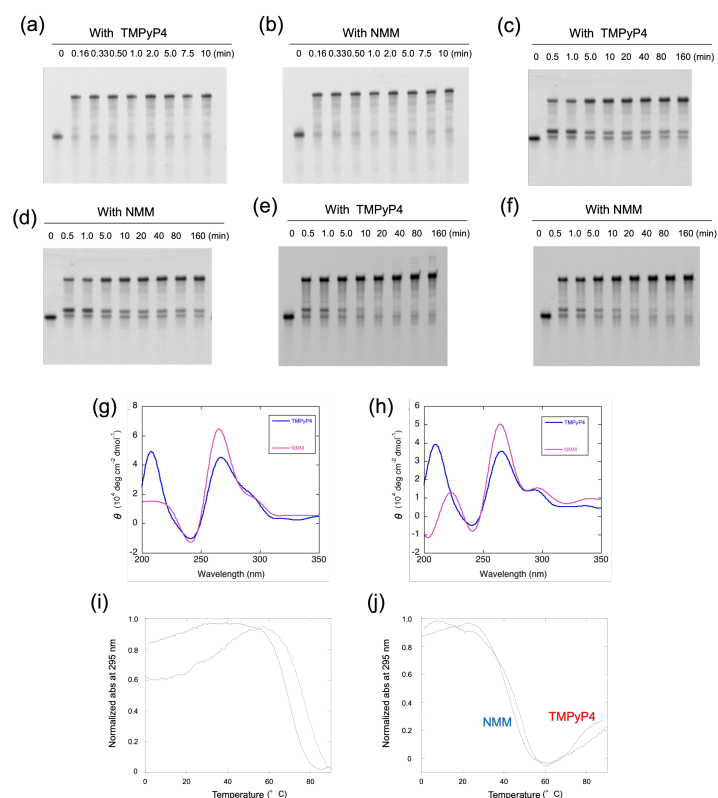

**Figure S2.** The effect of *meso*-tetrakis-(*N*-methyl-4-pyridyl)-porphyrin (TMPyP4) and *N*-methyl mesoporphyrin IX (NMM) on replication and structure of G4. (a-f) PAGE images of time courses of the replication of 1  $\mu$ M template DNA containing  $(T_2AG_3)_4$  sequence with (a) 10  $\mu$ M TMPyP4 in the presence of 1 mM potassium chloride (KCl), (b) 10  $\mu$ M NMM in the presence of 1 mM KCl, (c) 10  $\mu$ M TMPyP4 in the presence of 100 mM KCl, (d) 10  $\mu$ M NMM in the presence of 100 mM KCl, (e) 10  $\mu$ M TMPyP4 in the presence of 1 mM KCl and 20 wt% poly(ethylene glycol200) (PEG200), and (f) 10  $\mu$ M NMM in the presence of 1 mM KCl and 20 wt% PEG200. The reactions were performed at 37  $^{\circ}$ C using 1  $\mu$ M KF and 250  $\mu$ M deoxynucleoside triphosphates (dNTPs) in 10 mM Tris-hydrochloric acid (HCl) (pH 7.5), 8 mM magnesium chloride ( $MgCl_2$ ) with indicated concentration of KCl and with or without PEG200, as indicated. (g, h) CD spectra of 5  $\mu$ M  $(T_2AG_3)_4$  in the presence of 10  $\mu$ M TMPyP4 and 10  $\mu$ M NMM (g) in a solution containing 100 mM KCl and (h) a solution containing 1 mM KCl with 20 wt% PEG200. (i, j) UV melting of 5  $\mu$ M  $(T_2AG_3)_4$  in the presence of 10  $\mu$ M TMPyP4 and 10  $\mu$ M NMM (i) in a solution containing 100 mM KCl and (j) a solution containing 1 mM KCl with 20 wt% PEG200.

(a)

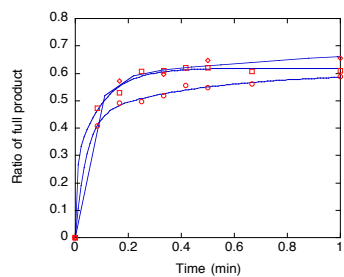

(b)

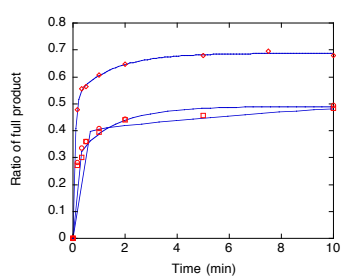

(c)

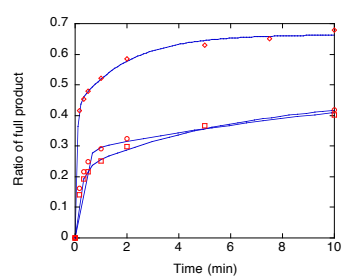

(d)

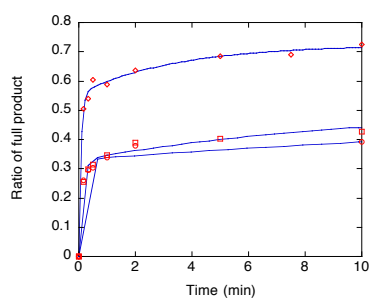

(e)

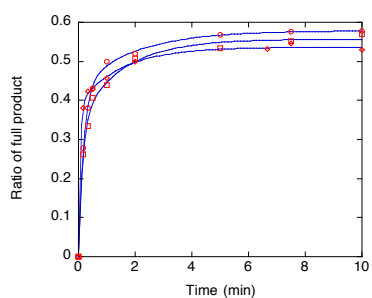

(f)

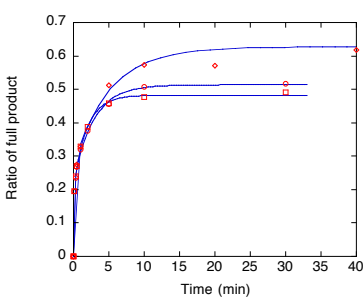

(g)

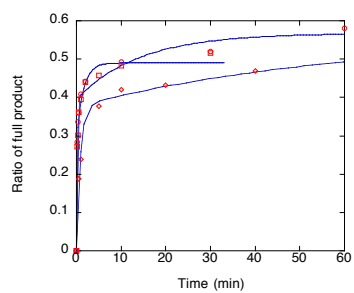

(h)

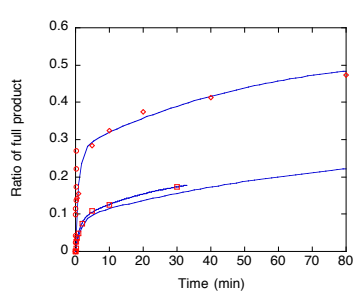

(i)

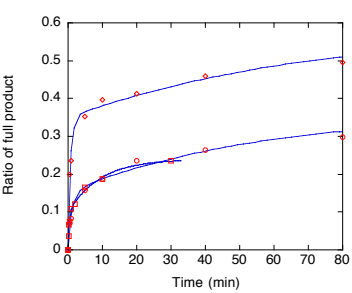

(j)

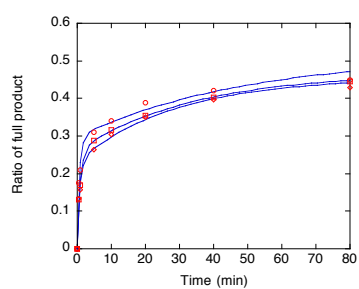

(k)

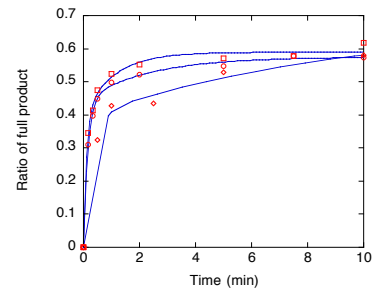

(l)

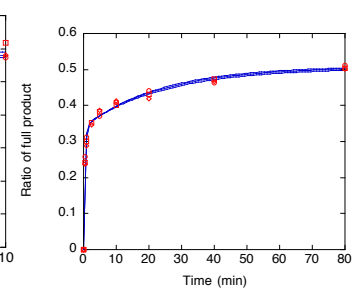

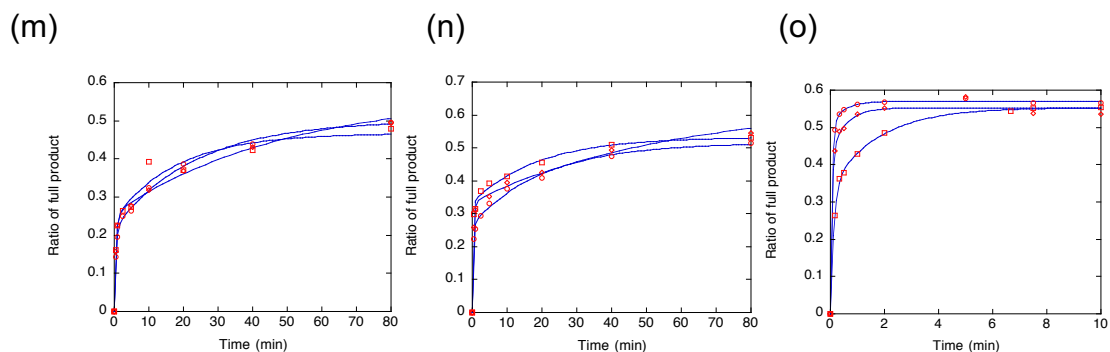

**Figure S3.** Time course of full-length product of the replication reaction. (a-e) Results in reactions in 1 mM potassium chloride (KCl) without poly(ethylene glycol200) (PEG200) and (a) without ligand, (b) with 10  $\mu$ M naphthalene diimides (NDI)-DM, (c) with 10  $\mu$ M cyclic (c)NDI1, (d) with 10  $\mu$ M cNDI2, and (e) with 50  $\mu$ M fisetin. (f-j) Results of reactions with 100 mM KCl without PEG200 and (f) without ligand, (g) with 10  $\mu$ M NDI-DM, (h) with 10  $\mu$ M cNDI1, (i) with 10  $\mu$ M cNDI2, and (j) with 50  $\mu$ M fisetin. (k-o) Results of reactions with 1 mM KCl and 20 wt% PEG200 and (k) without ligand, (l) with 10  $\mu$ M NDI-DM, (m) with 10  $\mu$ M cNDI1, (n) with 10  $\mu$ M cNDI2, and (o) with 50  $\mu$ M fisetin. The reactions were performed with 1  $\mu$ M KF and 250  $\mu$ M deoxynucleoside triphosphates (dNTPs) in the buffer containing 10 mM Tris-hydrochloric acid (HCl) (pH 7.5), 8 mM magnesium chloride ( $\text{MgCl}_2$ ), 1 or 100 mM KCl, and 0 or 20 wt% PEG200 at 37  $^{\circ}\text{C}$ . All plots show the results of triplicate reactions in each condition. The dotted lines are fitted to average value of triplicate data.

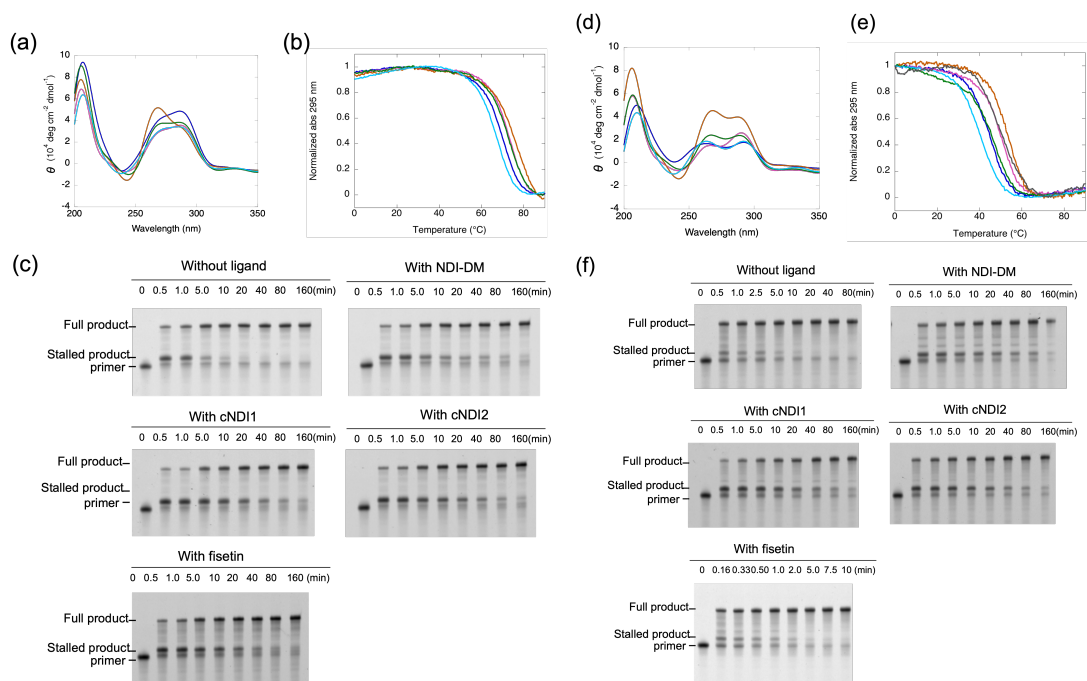

**Figure S4.** Spectroscopic data and replication results in the presence of 100 mM potassium chloride (KCl) or in the presence of 1 mM KCl and 20 wt% poly(ethylene glycol200) (PEG200) (A) CD spectra of 5  $\mu$ M  $(T_2AG_3)_4$  in the presence of 100 mM KCl without ligand (blue) and with 10  $\mu$ M naphthalene diimides (NDI)-DM (pink), cNDI1 (brown), cNDI2 (green), or 50  $\mu$ M fisetin (light blue) at 37  $^{\circ}$ C. (B) Ultra violet (UV) melting curves of 5  $\mu$ M  $(T_2AG_3)_4$  in the presence of 100 mM KCl without ligand (blue) and with 10  $\mu$ M NDI-DM (pink), cNDI1 (brown), cNDI2 (green), or 50  $\mu$ M fisetin (light blue). (C) Polyacrylamide gel electrophoresis (PAGE) images of time courses of the replication of 1  $\mu$ M  $(T_2AG_3)_4$ -containing template DNA in the presence of 100 mM KCl in the absence or presence of 10  $\mu$ M ligands. The reaction was carried out with 1  $\mu$ M KF exo- and 250  $\mu$ M deoxynucleoside triphosphates (dNTPs). (D) CD spectra of 5  $\mu$ M  $(T_2AG_3)_4$  in the presence of 20 wt% PEG200 without ligand (blue) and with 10  $\mu$ M NDI-DM (pink), cNDI1 (brown), cNDI2 (green), or 50  $\mu$ M fisetin (light blue) at 37  $^{\circ}$ C. (E) UV melting curves of 5  $\mu$ M  $(T_2AG_3)_4$  in the presence of 20 wt% PEG200 without ligand (blue) and with 10  $\mu$ M NDI-DM (pink), cNDI1 (brown), cNDI2 (green), or 50  $\mu$ M fisetin (light blue). (F) PAGE images of time courses of the replication of 1  $\mu$ M  $(T_2AG_3)_4$ -containing template DNA in the presence of 20 wt% PEG200 in the absence or presence of 10  $\mu$ M ligands. The reaction was carried

out with 1  $\mu$ M KF exo- and 250  $\mu$ M dNTPs. All experiments were performed in the buffer containing 10 mM Tris-hydrochloric acid (HCl) (pH 7.5) and 8 mM magnesium chloride ( $\text{MgCl}_2$ ) at 37 °C.
